# Supplementary material
Source: PubMed Central journal article supplement (PMC5980754)
Supplement: NIHMS951046-supplement-Supplementary.pdf [file NIHMS951046-supplement-Supplementary.pdf]

# Supporting Information: Theory for the Liquid–Liquid Phase Separation in Aqueous Antibody Solutions

Miha Kastelic<sup>†,‡</sup> and Vojko Vlachy<sup>\*,†</sup>

<sup>†</sup>*Faculty of Chemistry and Chemical Technology, University of Ljubljana, Večna pot 113,  
SI-1000 Ljubljana, Slovenia*

<sup>‡</sup>*Current address: National Institute of Chemistry, Hajdrihova 19, SI-1001 Ljubljana,  
Slovenia*

E-mail: vojko.vlachy@fkkt.uni-lj.si

## S1 Attraction range affects the coexistence curve

Here we show how the increase of attraction range among sites A, B, and C affects the liquid–liquid phase separation curve. This results supplement the section “The symmetric case” of the main text, therefore  $\varepsilon_{AB} = \varepsilon_{AC} = \varepsilon_{BC} = \varepsilon$  and  $\varepsilon_{AA} = \varepsilon_{BB} = \varepsilon_{CC} = 0$ . For associated attraction range  $\omega$  we assume to vary from  $0.025 \sigma$ ,  $0.050 \sigma$ ,  $0.075 \sigma$ , to  $0.100 \sigma$ . Next we calculate the liquid–liquid separation curves as a function of  $\omega$ . Results are shown in Figure S1.

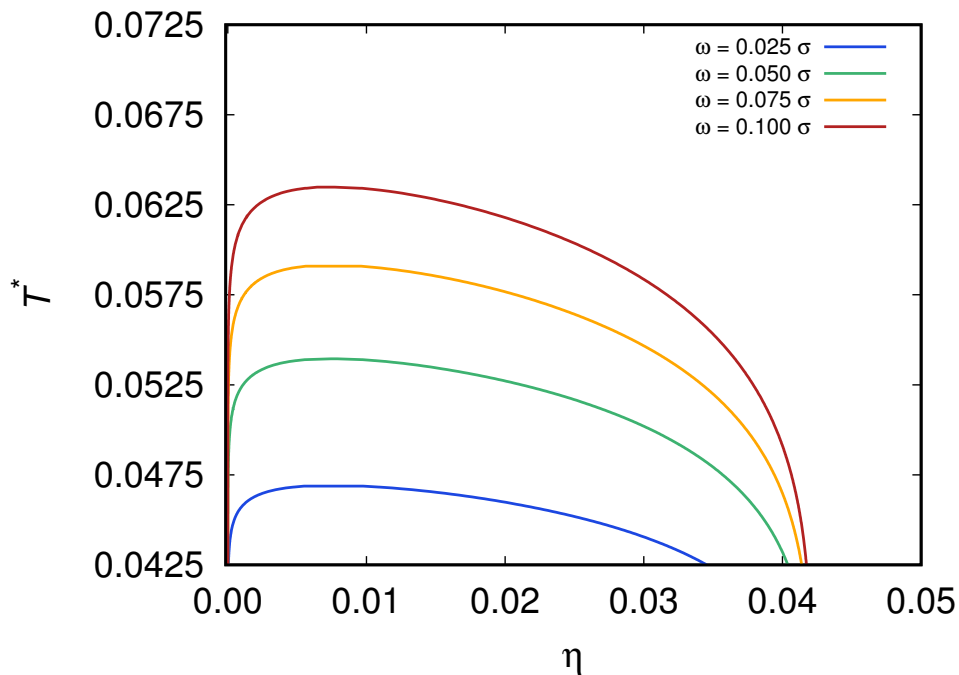

Figure S1: Liquid–liquid coexistence curves of the symmetric case ( $\varepsilon_{AB} = \varepsilon_{AC} = \varepsilon_{BC} = \varepsilon$ ) as a function of  $\omega$ , which varies in the range from  $0.025 \sigma$ ,  $0.050 \sigma$ ,  $0.075 \sigma$ , to  $0.100 \sigma$ . As before,  $T^* = k_B T / \varepsilon$ .

We see the similar trend as in Figure 3: larger  $\omega$  value shift the temperature of critical point toward higher values, while the critical concentration (critical  $\eta$ ) does not change much.
